# Supplementary material
Source: PubMed Central journal article supplement (PMC7958438)
Supplement: NIHMS1561625-supplement-Supplementary_Figure_1.pdf [file NIHMS1561625-supplement-Supplementary_Figure_1.pdf]

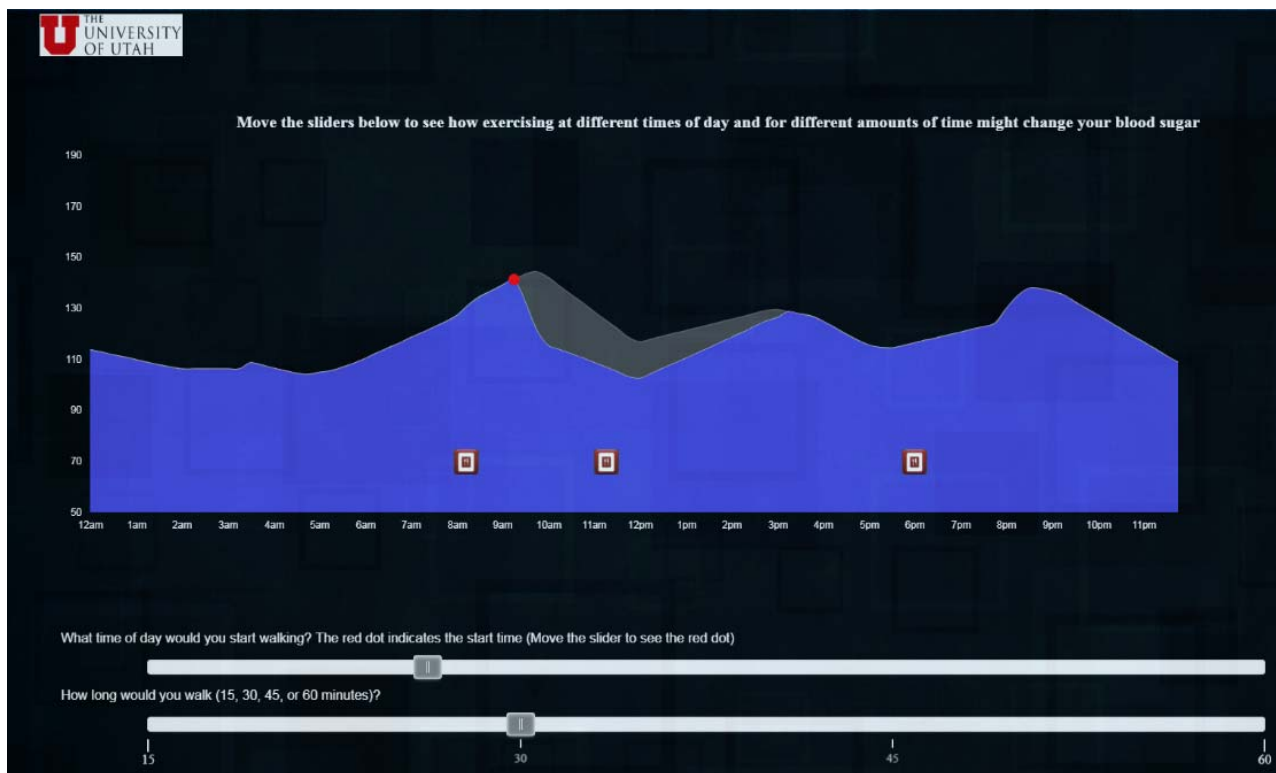

Supplemental Figure 1. Screenshots of the web-based simulator that demonstrates the effects of physical activity on glucose pattern at the day-level.
